# Supplementary material
Source: publisher figshare collection journal article supplement (https://sage.figshare.com/ndownloader/files/30778919)
Supplement: Supplementary file 1 [file 30778919]

# SAGE AUTHORSHIP CHANGE REQUEST

## INSTRUCTIONS:

Please complete all sections of this form. We require that **all** authors (including current co-authors, those to be added and those to be removed) sign the relevant sections below. We require all signatures on the same copy of the form. Once complete, please email the form back to the sender.

## SECTION ONE: PAPER INFORMATION

|                                                                                                |                                                   |  |
|------------------------------------------------------------------------------------------------|---------------------------------------------------|--|
| JOURNAL NAME                                                                                   | International Journal of Advanced Robotic Systems |  |
| PAPER TITLE                                                                                    | MANUSCRIPT ID NUMBER                              |  |
| Autonomous Land Vehicle Path Planning Algorithm Based on Improved Heuristic Function of A-Star | ARX-21-0072.R1                                    |  |

## SECTION TWO: ESSENTIAL CONDITIONS FOR CHANGE

The new author list should contain only those who can legitimately claim authorship. This is all those who:

- 1) Have made a substantial contribution to the concept or design of the article; or the acquisition, analysis, or interpretation of data for the article; AND
- 2) Drafted the article or revised it critically for important intellectual content; AND
- 3) Approved the version to be published; AND
- 4) Agreed to be accountable for all aspects of the work in ensuring that questions related to the accuracy or integrity of any part of the work are appropriately investigated and resolved.

NB: Registered authors should meet the conditions of all of the points above. All contributors who do not meet the criteria for authorship should instead be listed in an 'Acknowledgements' section.

## SECTION THREE: REASON FOR AUTHORSHIP CHANGE

|                                                                                                                                                                                                                                                                                                                                                                  |
|------------------------------------------------------------------------------------------------------------------------------------------------------------------------------------------------------------------------------------------------------------------------------------------------------------------------------------------------------------------|
| Please provide a detailed explanation for the change in authors in the box below.                                                                                                                                                                                                                                                                                |
| We have added an author Xiao Shen, and the changed author list is Jing Zhang, Jun Wu, Xiao Shen and Yunsong Li.                                                                                                                                                                                                                                                  |
| The newly added author Xiao Shen participated in the theoretical part of the paper. In the process of revising the thesis, his main contribution is to verify and calibrate the theory and formula. He is also responsible for the experimental part, is responsible for using ROS to build a verification platform, and using SLAM to build environmental maps. |
| In view of his contribution, all authors agree to the revised list and order of authors, there is no dispute about this.                                                                                                                                                                                                                                         |

## SECTION FOUR: AUTHOR DECLARATIONS

We agree to the proposed change of authorship to the above paper. NB: all authors (added and removed) must sign below.

DECLARATION: All the below listed authors agree that they can claim authorship to the submitted paper as they meet the criteria of the points listed in SECTION TWO.

[illegible]

DECLARATION: All the below listed authors agree that they cannot claim authorship to the submitted paper as they do not (or no longer) meet the criteria of the points listed in SECTION TWO.

List of removed authors. Please sign, indicating your agreement to be removed from the list of registered authors. The individuals listed below will not be credited as authors in the published paper. (Please ask if additional rows are required.)

[illegible]
